# Supplementary material for: Mesenchymal Stem Cell-Derived Exosomes miR-143-3p Attenuates Diabetic Kidney Disease by Enhancing Podocyte Autophagy via Bcl-2/Beclin1 Pathway
Source: MDPI journal article supplement (doi:10.3390/biomedicines14010184), 2026-01-14
Supplement: s1 [file Supplementary Table S1.pdf › Supplementary Table S1.pdf]

**Table.S1**

**Primers for qPCR:**

| Gene           | Forward (5'-3')       | Reverse (5'-3')      | Product(bp) |
|----------------|-----------------------|----------------------|-------------|
| LC3            | TTCGGGTIGCTCTTTTGGGT  | GACAGGCAAGGGCCTAACAA | 98          |
| Beclin1        | TAGCTGAAGACCGGGCGAT   | CCACCCAGGCTCGTTCTAC  | 92          |
| Bcl-2          | GCTGGGGATGACTTCTCTCG  | CCACAATCCTCCCCCAGTTC | 148         |
| U6             | TTCGGCAGCACATATACT    | AATTTGCGTGTCATCCTT   | 78          |
| $\beta$ -actin | GATCAGCAAGCAGGAGTACGA | GGGTGTAACACGCAGCTCA  | 92          |
| miR-143-3p     | CGCGTGAGATGAAGCACTG   | AGTGCAGGGTCCGAGGTATT |             |

**Stem-loop primers for miR-143-3p RT-PCR:**

GTCGTATCCAGTGCAGGGTCCGAGGTATTTCGCACTGGATACGACGAGCTA
